# Supplementary material for: Identification and localization of polar tube proteins in the extruded polar tube of the microsporidian Anncaliia algerae
Source: PubMed Central journal article supplement (PMC10229552; doi:10.1038/s41598-023-35511-y), 2023-05-30
Supplement: 41598_2023_35511_MOESM1_ESM.pdf [file 41598_2023_35511_MOESM1_ESM.pdf]

**Figure S1. Alignment of PTP2 amino acid sequences identified in *A. algerae*.** Corresponding proteins were incomplete in their N-terminal region. A 5'-RACE-PCR approach allowed to identify the lacking sequence coding for the N-terminal part of PTP2c (sequence in red). PTP2c predicted signal peptide is boxed. PTP2 proteins have a conserved C-terminal region and a variable N-terminal region due to insertions/deletions events in repeated motifs rich in glycine and serine residues. Identical amino acids are highlighted in grey and the eight cysteine residues in conserved position are highlighted in black. The two sequences underlined in black correspond to regions that were selected for the expression of recombinant polypeptides in *E. coli*. Specific peptides for each PTP2 were identified by mass spectrometry analysis and are underlined in red. This confirms the presence of the three PTP2 in the *A. algerae* polar tube. Amino acids are numbered on the right. The accession number for the full-length PTP2c is WAQ68435.1. The contig names for PTP2a and PTP2b are KI0AQA2Y004FM1\_3..1481 and KI0ALA25YH17FM1:c(216..1571), respectively and are available under the accession number GCA\_000313815.1.

|       |                                                                                                      |     |
|-------|------------------------------------------------------------------------------------------------------|-----|
| PTP2c | <u>MRKPVLLAILLVFYQSQA</u> <u>SYSWSSSSRRSSSGGSRGGGSSGGAS</u> SSGGSGGASMSGVSSGG                        | 60  |
| PTP2b | -----                                                                                                | 0   |
| PTP2a | -----                                                                                                | 0   |
| PTP2c | SSMSFSGGSSGGASSGGSSSHGSGGSGSGSSGHGSGSGGGAPGKSSGSESGSGAPGGGS                                          | 120 |
| PTP2b | -----GGSGSGSGSGSGHSGSGGGAPG-----GSGSGAPGGGS                                                          | 35  |
| PTP2a | -----GSGSGHSGSGSGGGAPGGSGHSGSGTTPGGGS                                                                | 34  |
| PTP2c | <u>GS</u> SGSGSGHSGSGGGAPGGGSGNGSGSGSGHSGSGGGAPGGGSGSGAPGGGSGGGSG                                    | 180 |
| PTP2b | GGSGSGSGHSGSGGGAPGGGSGNGSGAGSNG-----SGSGAPGGGSGSGPG                                                  | 84  |
| PTP2a | <u>GS</u> GPSSGSGHSGSGGGAPGGGSDSGAGSGAQGGSSAGE-----                                                  | 75  |
| PTP2c | <u>SGSGHSGSGGGAPGGGSDSGAGSGAQGGSSAGEGSGAKGSGSAGEGSGAQGGSSAG</u>                                      | 239 |
| PTP2b | <u>SGSGHSGSGGGAPGGGSDSGAGSGAQGGSSAGEGSGAKGSGSAGEGSGAQGGSSAGE</u>                                     | 144 |
| PTP2a | <u>-----GSGAKG-----SGSAGEGSGAQGGSSAGEGSGAKGSGSAGEGSGAQGGSSAG</u>                                     | 122 |
| PTP2c | <u>-----EGSGAKGSGSAGEGNAPEKGAEGSGQAQKPGIGQAGPGNAAAQGDSTGA</u>                                        | 288 |
| PTP2b | <u>GSGAKGGSSAGEGSGALGSGSAGEGNAPEKGAEGSGQAQKPGIGQAGPGNAAAQGDSTGA</u>                                  | 204 |
| PTP2a | <u>-----EGSGAQGSGSAGEGNAPEKGAEGSGQAQKPGIGQAGPGNAAAQGDSTGA</u>                                        | 171 |
| PTP2c | ANDLVALETHKALKTALNQSMANSVSPQTANEFNLAGNPECNQQAVEGNWVKVINEKIKQEC                                       | 348 |
| PTP2b | ANDLVALETHKALKTALNQSMANSVSPQTANEFNLAGNPECNQQAVEGNWVKVINEKIKQEC                                       | 264 |
| PTP2a | ANDLVALETHKALKTALNQSMANSVSPQTANEFNLAGNPECNQQAVEGNWVKVINEKIKQEC                                       | 231 |
| PTP2c | RNKMNERKAKAEQIAKFITKPTPDKCVKKNLPNALVCCQALTMNTIIKQPRFKIDLIGSN                                         | 408 |
| PTP2b | RNKNVNERKAKAEQIAKFITKPTPDKCVKKNLPNALVCCQALTMNTIIKQPRFKIDLIGSN                                        | 324 |
| PTP2a | RNKNVNERKAKAEQIAKFITKPTPDKCVKKNLPNALVCCQALTMNTIIKQPRFKIDLIGSN                                        | 291 |
| PTP2c | VVEIKKDGSPILLGVAESLNYNVTMKMRKRYNPLKNPTARLEFNELGSLKQEGEIPKPK                                          | 468 |
| PTP2b | VVEIKKDGSPILLGVAESLNYNVTMKMRKRYNPLKNPTARLEFNELGSLKQEGEIPKPK                                          | 384 |
| PTP2a | VVEIKKDGSPILLGVAESLNYNVTMKMRKRYNPLKNPTARLEFNELGSLKQEGEIPKPK                                          | 351 |
| PTP2c | RLDFCGSCLLEKLSKKAQVEGEKDMCGGC <del>D</del> ALMELNSLKRGSFNNLQ <del>T</del> ENKKPEVTP <del>T</del> ETT | 528 |
| PTP2b | RLDFCGSCLLEKLSKKAQVEGEKDMCGGC <del>D</del> ALMELNSLKRGSFNNLQ <del>T</del> ENKKPEVTP <del>T</del> ETT | 444 |
| PTP2a | RLDFCGSCLLEKLSKKAQVEGEKDMCGGC <del>D</del> ALMELNSLKRGSFNNLQ <del>T</del> ENKKPEVTP <del>T</del> ETT | 411 |
| PTP2c | <u>KAAEESK</u>                                                                                       | 535 |
| PTP2b | <u>KAAEESK</u>                                                                                       | 451 |
| PTP2a | <u>KAAEESK</u>                                                                                       | 418 |
